## ■ CASE REPORTS

Anesthesiology  
83:860-863, 1995  
© 1995 American Society of Anesthesiologists, Inc.  
Lippincott-Raven Publishers

### Epidural and Intravenous Opioid-induced Neuroexcitation

Jonathan P. Rozan, M.D.,\* Cynthia H. Kahn, M.D.,† Carol A. Warfield, M.D.‡

EPIDURAL and intrathecal opioids have been used to treat both chronic and acute postoperative pain. Common side effects of this therapy include pruritus, nausea, vomiting, and urine retention. Rarely, respiratory depression, dysphoria,<sup>1</sup> and infection<sup>2</sup> occur. Even less commonly, myoclonus has been described as a side effect of intraspinal morphine,<sup>3</sup> hydromorphone,<sup>4</sup> and diacetylmorphine.<sup>5</sup> It has not been reported to have occurred with epidural morphine at a dose less than 25 mg/h. Apparent seizure activity without electroencephalographic monitoring has been reported with intravenous meperidine,<sup>6</sup> morphine,<sup>7</sup> and diacetylmorphine.<sup>8</sup> Seizure activity from intravenous hydromorphone has not been described. We report the occurrence of myoclonus induced by epidurally administered morphine that progressed to grand mal seizure activity after a large dose of intravenous hydromorphone.

#### Case Report

A 47-yr-old, 47-kg woman with metastatic breast cancer presented to the pain management center for control of pain in her left arm and axilla. Her pain was inadequately controlled with rapidly increasing doses of intravenous fentanyl and was accompanied by increasingly severe nausea and vomiting. At a fentanyl infusion of 600 µg/h, the decision was made to place an epidural catheter with the goal of decreasing side effects and improving analgesia. A temporary

epidural catheter was placed, and an epidural infusion of preservative-free morphine (0.2% solution) at 6 mg/h was begun. The intravenous fentanyl infusion was converted to demand-mode patient-controlled analgesia. An oral tricyclic antidepressant and nonsteroidal antiinflammatory drug were added to augment her pain control. Daily patient-controlled analgesia fentanyl use was calculated, converted to morphine equivalents, and added to the epidural infusion. Over 2 days the patient experienced excellent pain relief. A Du Pen long-term epidural catheter (Davol, Cranston, RI) was, therefore, placed. The catheter entered the epidural space at L1 with the tip at T10. The patient was discharged home, without pain, receiving 50 mg oral amitriptyline every hour, 500 mg oral naproxen twice daily, and epidural morphine (0.2% solution) at 12 mg/h.

Five days after instituting the epidural morphine, the patient began to experience mild myoclonic contractions of her lower extremities. She had no history of involuntary muscle contractions or seizure. These spasms would last 2-3 s and occurred once every few hours. The myoclonus increased in intensity and frequency over the next few days, by which time the patient was evaluated in the pain clinic. Physical examination results remained unchanged from baseline. Radiographic contrast was easily and painlessly injected through the Du Pen catheter. The catheter tip was confirmed to be in good position on fluoroscopy. Magnetic resonance imaging did not reveal an abscess or mass lesion in her thoracolumbar spine. Electrolytes, magnesium, and calcium were within the normal laboratory range. Because myoclonus can be associated with use of adjuvant medications, the amitriptyline and naproxen were stopped.

Over the next 9 days, the myoclonic episodes increased in frequency and intensity to the point that she could no longer walk or sleep normally. The myoclonic spasms lasted about 3-5 s and occurred approximately once every 5-10 min. They caused her significant pain and were exhausting. She continued to have excellent pain relief in her left arm. Physical examination results remained unchanged. She did not exhibit hyperesthesia or allodynia, nor did she experience spasms in her upper extremities. The patient was admitted, 14 days after instituting epidural morphine infusion, for control of myoclonus.

A single dose of 0.5 mg oral clonazepam followed by 10 mg diazepam failed to change the character of the myoclonus, although the patient became sedated and was able to sleep. Morphine was discontinued, and epidural hydromorphone (0.1% solution) at 1.5 mg/h was instituted. Intravenous fentanyl patient-controlled analgesia, 50 µg/injection, demand only, was started to facilitate the transition of morphine to hydromorphone. The myoclonus resolved 12 h after stopping the epidural morphine infusion.

Over the next few days, the patient's pain recurred and became difficult to control. The epidural hydromorphone dose was rapidly increased to 12 mg/h. The fentanyl patient-controlled analgesia was changed to intravenous hydromorphone. Three days after initiating hydromorphone therapy, the lower extremity myoclonus returned. The patient was receiving epidural hydromorphone (1% solution) at 12 mg/h and had self-administered 874 mg intravenous hydro-

\* Assistant Clinical Professor of Anesthesiology, Columbia University, St. Luke's/Roosevelt Medical Center, New York, New York.

† Instructor in Anesthesia, Harvard Medical School, Beth Israel Hospital, Boston, Massachusetts.

‡ Associate Professor, Harvard Medical School, Boston, Massachusetts; Director, Pain Management Center, Beth Israel Hospital, Boston, Massachusetts.

Received from the Department of Anesthesiology, Pain Management Center, Beth Israel Hospital, Boston, Massachusetts. Submitted for publication February 2, 1995. Accepted for publication May 9, 1995.

Address reprint requests to Dr. Rozan: Department of Anesthesiology, Pain Management Center, Beth Israel Hospital, 330 Brookline Avenue, Boston, Massachusetts 02215.

Key words: Analgesics, opioid: morphine, hydromorphone, Anesthetic technique: epidural, Pain: cancer, Complications: myoclonus, seizure.

morphine over 24 h. Her laboratory values changed nor had her physical examination appeared to decrease the intensity of the pain. The patient underwent a selective sympathectomy the following day.

Postoperatively, the patient continued to have shoulder and back pain. An intravenous infusion of 30 mg/h did not control the pain. The patient was given 50-150 mg intravenous morphine as needed in 10-15 min. Daily patient-controlled analgesia fentanyl use was calculated, converted to morphine equivalents, and added to the epidural infusion. Over 2 days the patient experienced excellent pain relief. A Du Pen long-term epidural catheter (Davol, Cranston, RI) was, therefore, placed. The catheter entered the epidural space at L1 with the tip at T10. The patient was discharged home, without pain, receiving 50 mg oral amitriptyline every hour, 500 mg oral naproxen twice daily, and epidural morphine (0.2% solution) at 12 mg/h.

Five days after instituting the epidural morphine, the patient began to experience mild myoclonic contractions of her lower extremities. She had no history of involuntary muscle contractions or seizure. These spasms would last 2-3 s and occurred once every few hours. The myoclonus increased in intensity and frequency over the next few days, by which time the patient was evaluated in the pain clinic. Physical examination results remained unchanged from baseline. Radiographic contrast was easily and painlessly injected through the Du Pen catheter. The catheter tip was confirmed to be in good position on fluoroscopy. Magnetic resonance imaging did not reveal an abscess or mass lesion in her thoracolumbar spine. Electrolytes, magnesium, and calcium were within the normal laboratory range. Because myoclonus can be associated with use of adjuvant medications, the amitriptyline and naproxen were stopped.

Over the next 9 days, the myoclonic episodes increased in frequency and intensity to the point that she could no longer walk or sleep normally. The myoclonic spasms lasted about 3-5 s and occurred approximately once every 5-10 min. They caused her significant pain and were exhausting. She continued to have excellent pain relief in her left arm. Physical examination results remained unchanged. She did not exhibit hyperesthesia or allodynia, nor did she experience spasms in her upper extremities. The patient was admitted, 14 days after instituting epidural morphine infusion, for control of myoclonus.

A single dose of 0.5 mg oral clonazepam followed by 10 mg diazepam failed to change the character of the myoclonus, although the patient became sedated and was able to sleep. Morphine was discontinued, and epidural hydromorphone (0.1% solution) at 1.5 mg/h was instituted. Intravenous fentanyl patient-controlled analgesia, 50 µg/injection, demand only, was started to facilitate the transition of morphine to hydromorphone. The myoclonus resolved 12 h after stopping the epidural morphine infusion.

Over the next few days, the patient's pain recurred and became difficult to control. The epidural hydromorphone dose was rapidly increased to 12 mg/h. The fentanyl patient-controlled analgesia was changed to intravenous hydromorphone. Three days after initiating hydromorphone therapy, the lower extremity myoclonus returned. The patient was receiving epidural hydromorphone (1% solution) at 12 mg/h and had self-administered 874 mg intravenous hydro-

#### Discussion

Opioid-induced myoclonus has been reported in animal models. Mu receptors mediate the etiology of opioid receptor-mediated excitatory and inhibitory effects. Metabolic products of opioids have been implicated as well. Animal models have shown that antagonists of opioid-induced neuroexcitation. Shohami et al. reported that intrathecal morphine is reversible with intraperitoneal administration of specific µ agonists morphine antagonists D-Ala<sup>2</sup>-D-Leu<sup>5</sup> and Ser-Gly-Phe-Leu-Thr (Snead<sup>10</sup>) into the lateral ventricle on a cerebrospinal fluid-mon-

## CASE REPORTS

morphine over 24 h. Her laboratory study results had not significantly changed nor had her physical examination results. The patient was sedated with 5 mg intravenous diazepam every 2 h as needed. This appeared to decrease the intensity and frequency of the myoclonus. The patient underwent a selective dorsal rhizotomy at C4-T3 on the following day.

Postoperatively, the patient complained of severe incisional as well as shoulder and back pain. An intravenous infusion of hydromorphone 30 mg/h did not control the pain. Epidural infusion was associated with intolerable neck and shoulder pain and was discontinued. Boluses of 50–150 mg intravenous hydromorphone were given every 10–15 min as needed in an attempt to control her pain. Nonsteroidal antiinflammatory drugs were not used because of concern of causing postoperative bleeding. Postoperative myoclonus involved all of her extremities. These spasms became diminished in intensity and frequency with intravenous boluses of 10–30 mg diazepam. The patient also reported new findings of allodynia and hyperesthesia over her trunk and extremities. After receiving 3,600 mg intravenous hydromorphone and 270 mg diazepam over a 7-h period, the patient experienced a grand mal seizure that responded to 150 mg thiopental in divided doses. The patient's laboratory data were normal. After a brief postictal period, she was awake, alert, and responsive. Phenytoin (1 g) was administered intravenously to prevent further seizure activity.

The patient received 100 mg/h intravenous hydromorphone, 10 mg intravenous diazepam every 2 h as needed, and 100 mg intravenous phenytoin three times daily. The myoclonic jerks continued. She did not exhibit further seizure activity. Because it was becoming increasingly difficult to keep her comfortable, 300 mg intravenous phenobarbital was administered, followed by a dose of 130 mg intravenously every 8 h. The myoclonus decrease in intensity and frequency with the phenobarbital, although it did not resolve completely. The patient remained sedated and comfortable. Cardiac arrest occurred approximately 32 h after starting the phenobarbital therapy. She was not resuscitated, at the family's request.

## Discussion

Opioid-induced hyperalgesia, myoclonus, and seizures have been reproduced and studied extensively in animal models. Much controversy, however, surrounds the etiology of this neuroexcitation. Direct opioid receptor-mediated and nonopioid receptor-mediated excitatory and inhibitory mechanisms have been explored. Metabolic products and preservatives have been implicated as well.

Animal models have demonstrated the reversibility of opioid-induced neuroexcitation by specific opioid antagonists. Shohami *et al.*<sup>9</sup> reported myoclonus from intrathecal morphine in rats, which was partially reversible with intraperitoneal and intrathecal naloxone. Specific  $\mu$  agonists morphine and morphiceptin and  $\delta$  agonists D-Ala<sup>2</sup>-D-Leu<sup>5</sup>-enkephalin (DADL) and Tyr-D-Ser-Gly-Phe-Leu-Thr (DSLET) were administered by Snead<sup>10</sup> into the lateral ventricle of rats, inducing electroencephalogram-monitored seizures. Intracerebral

naloxone blocked all opioid-induced seizures. A specific  $\delta$  antagonist, ICI 154,129, blocked DSLET seizures, had little effect on DADL seizures, and had no effect on morphine or morphiceptin seizures. Administration of  $\kappa$  agonists by Bansinath *et al.*<sup>11</sup> into the intracerebroventricular space of mice induced convulsions. Naloxone suppressed the convulsions, but nonopioid antagonists MK-801 (an N-methyl-D-aspartate blocker), ketamine, muscimol, and baclofen did not. *In vitro* studies with specific  $\mu$ -,  $\delta$ -, and  $\kappa$ -opioid receptor agonists have been reported to mediate direct, naloxone-reversible, excitatory effects,<sup>12</sup> supporting the notion that opioid receptors mediate narcotic-induced neuroexcitation.

Evidence exists that disputes opioid receptors as mediators of neuroexcitatory effects. Frenk *et al.*<sup>13</sup> injected rats with intrathecal morphine and observed hind limb myoclonus that was potentiated by intrathecal naloxone. Yoburn *et al.*<sup>14</sup> found similar results with mice. Shohami *et al.*<sup>15</sup> was unable to reverse the myoclonic effects of intrathecal morphine in rats with naloxone but was able to reduce them by approximately 60% with pretreatment with a serotonin blocking agent. Moreover, naloxone therapy for opioid-induced myoclonus has been reported to cause seizure activity.<sup>16</sup>

Opioid-induced effects on excitatory and inhibitory neurotransmitters may play a role in this phenomenon. N-methyl-D-aspartate receptor-mediated, excitatory, glutamate responses have been implicated in opioid-induced neuroexcitation.<sup>17</sup> Chen *et al.*<sup>18</sup> was able to measure a sustained release of glutamate activated current with a specific  $\mu$ -agonist in dorsal horn neurons. In contrast, however, opioids may inhibit tonically active inhibitory systems. Intrathecal opioids, including morphine, hydromorphone, and morphine-3-glucuronide, have been found to cause allodynia and, less frequently, myoclonus in rats.<sup>19,20</sup> Strychnine (a specific glycine antagonist) and bicuculline (a specific GABA<sub>A</sub> antagonist) can duplicate this allodynia<sup>21</sup> or amplify it in hyperalgesia models.<sup>22</sup> These effects were not blocked with baclofen but were with ketamine and MK-801. Moreover, morphine-induced glycine and GABA antagonism is associated with paroxysmal depolarizations in cultured spinal cord neurons.<sup>23</sup>

Armstrong *et al.*<sup>16</sup> and others have written on the neuroexcitatory effects of normeperidine, a metabolic product of meperidine. Glare *et al.*<sup>24</sup> found plasma normorphine in two patients receiving a large dose of morphine and suggests this metabolite may be responsible for some of morphine's neurologic side effects.



## CASE REPORTS

Perhaps a metabolite of hydromorphone, hydromorphone-3-glucuronide<sup>25</sup> is neuroexcitatory, as is morphine-3-glucuronide in animal models.<sup>19,20,26</sup> It would seem unlikely, however, that a metabolite produced in the liver would produce isolated myoclonus in the lower extremities of patients receiving intraspinal opiates. These metabolites could be implicated with systematically administered opioids, although the parent compounds have their own neuroexcitatory features. Rarely, the preservative sodium bisulfite has been suggested as the cause of myoclonus and seizures when administered with intravenous morphine in large doses.<sup>7</sup>

Our patient experienced lower extremity myoclonus from epidural morphine at 12 mg/h, less than half the dose reported by Parkinson *et al.*,<sup>4</sup> and seizure activity from high-dose intravenous hydromorphone. A brain computed tomography scan was not performed; therefore, intracerebral pathology cannot be excluded. It seems most likely, however, because the lower extremity myoclonus resolved with discontinuation of epidural morphine and then reappeared with high-dose intravenous hydromorphone, that it was caused by the opioids. Moreover, the isolation of myoclonus to the lower extremities suggests a spinal action of the epidurally administered morphine.

The preliminary attempt to treat this patient's myoclonus, as suggested by Potter *et al.*,<sup>27</sup> was to discontinue treatment with antidepressant and nonsteroidal antiinflammatory drug adjuvant medications. This proved ineffective. Benzodiazepine and phenobarbital therapy were useful only at doses that caused profound sedation. Baclofen was not used, but it has been reported to be ineffective at 10 mg orally three times daily.<sup>4</sup> Dilantin therapy did not effect the frequency or intensity of the myoclonus, a question raised by Parkinson *et al.*,<sup>4</sup> although no further seizure activity was noted after its institution. In all of the case reports referenced and in our patient, the only means of clinically resolving opioid-induced neuroexcitation has been either to change the type of opioid (perhaps to a non-morphine-related opioid, as suggested by Sögren *et al.*<sup>28</sup>) or to significantly decrease its dose. This has been accomplished most frequently by decreasing afferent pain impulses through neurolytic procedures or through the addition of intraspinal local anesthetic. In our patient, simply switching from epidural to intravenous opioid administration did not provide resolution of the neuroexcitation. Instead, it changed the character of the neuroexcitation from regional, lower

extremity myoclonus to global myoclonus, progressing finally to a grand mal seizure.

The progression of myoclonus to frank seizure activity suggests that these phenomena reside on a continuum. The appearance, therefore, of myoclonus in a patient receiving a large dose of opioids should be considered a sign of possible impending seizure. It would be reasonable to consider using a means of resolving opioid-induced myoclonus. Such therapy may avert the development of a grand mal seizure.

## References

1. Cousins MJ, Mather LE: Intrathecal and epidural administration of opioids. *ANESTHESIOLOGY* 61:276-310, 1984
2. Du Pen SL, Peterson DG, Williams A, Bogosian AJ: Infection during chronic epidural catheterization: Diagnosis and treatment. *ANESTHESIOLOGY* 73:905-909, 1990
3. De Conno F, Caraceni A, Martini C, Spoldi E, Salvetti M, Ventafredda V: Hyperalgesia and myoclonus with intrathecal infusion of high-dose morphine. *Pain* 47:337-339, 1991
4. Parkinson SK, Baily SL, Little WL, Mueller JB: Myoclonic seizure activity with high-dose spinal opioid administration. *ANESTHESIOLOGY* 72:743-745, 1990
5. Jayawardena B, Hill DJ: Myoclonic spasms after epidural diamorphine infusion. *Anaesthesia* 46:473-474, 1991
6. Armstrong PJ, Bersten A: Normeperidine toxicity. *Anesth Analg* 65:536-538, 1986
7. Gregory RE, Grossman S, Sheidler VR: Grand mal seizures associated with high-dose intravenous morphine infusions: Incidence and possible etiology. *Pain* 51:255-258, 1992
8. Turner D: Diamorphine toxicity. *Anaesthesia* 47:168-169, 1992
9. Shohami E, Evron S, Weinstock M, Soffer D, Carmon A: A new animal model for action myoclonus. *Adv Neurol* 43:545-552, 1986
10. Snead OC III: Opiate-induced seizures: A study of  $\mu$  and  $\delta$  specific mechanisms. *Exp Neurol* 93:348-358, 1986
11. Bansinath M, Ramabadrhan K, Turndorf H, Shukla VK: Intracerebroventricular administration of  $\kappa$ -agonists induces convulsions in mice. *Brain Res Bull* 27:75-79, 1991
12. Crain SM, Shen K: Opioids can evoke direct receptor-mediated excitatory effects on sensory neurons *Trends Pharmacol Sci* 11:77-81, 1990
13. Frenk H, Watkins LR, Mayer DJ: Differential behavioral effects induced by intrathecal microinjection of opiates: Comparison of convulsive and cataleptic effects produced by morphine, methadone, and D-Ala<sup>2</sup>-methionine-enkephalinamide. *Brain Res* 299:31-42, 1984
14. Yoburn BC, Lutfy K, Sierra V, Tortella FC: Tolerance develops to spinal morphine analgesia but not morphine-induced convulsions. *Eur J Pharmacol* 176:63-67, 1990
15. Shohami E, Evron S: Intrathecal morphine induces myoclonic seizures in the rat. *Acta Pharmacol Toxicol* 56:50-54, 1985
16. Reutens DC, Stewart-Wynne EG: Norpethidine induced myoclonus in a patient with renal failure (letter). *J Neurol Neurosurg Psychiatry* 52:1450-1451, 1989
17. Huang LM: The excitatory effects of opioids. *Neurochem Int* 20:463-468, 1992

## CASE REPORTS

18. Chen L, Huang LM: Sustained glutamate responses evoked by a  $\mu$  opioid. *Neuron* 7:319-327, 1991
19. Yaksh TL, Harty GJ: Pharmacokinetics of morphine evoked by high dose intrathecal injection. *Neurosci Lett* 24:501-507, 1987
20. Yaksh TL, Harty GJ, Onofri B: Intrathecal morphine produces a nonopioid receptor-mediated antinociceptive effect: Theoretical implications. *ANESTHESIOLOGY* 73:905-909, 1990
21. Yaksh TL: Behavioral and pharmacological studies of evoked allodynia produced by intrathecal morphine: Modulatory receptor systems are involved. *Pain* 37:111-123, 1989
22. Yamamoto T, Yaksh TL: Intrathecal morphine and bicuculline on nerve compression: Selective antagonism by MK-801. *Neurosci Lett* 141:1-4, 1992

Anesthesiology

83:863-866, 1995

© 1995 American Society of Anesthesiologists

Lippincott-Raven Publishers

Sever

Adm Had

THE interaction of nitrofurantoin with known from experimental and clinical reports.<sup>1-4</sup> amin in vitamin B<sub>6</sub> and involved in one-carbon metabolism, which requires synthesis, which requires a cofactor state to act as its cofactor. drome associated with c

\* Chief Resident in Anesthesiology

† CA-2 Resident in Anesthesiology

‡ Associate Director of Anesthesiology

§ Director of Anesthesiology; P

Received from the Department of Anesthesiology, Columbia University Medical Center, New York, New York, 10032.

27, 1995. Accepted for publication, April 10, 1995.

Department of Anesthesiology, Columbia University Medical Center, Amsterdam Avenue at 111th Street, New York, New York 10032.

Key words: Anesthesia; adverse effects; anemia; pernicious anemia; spinal cord; paraplegia.

Anesthesiology, V 83, No 4, Oct 1995

## CASE REPORTS

18. Chen L, Huang LM: Sustained potentiation of NMDA receptor-mediated glutamate responses through activation of protein kinase C by a  $\mu$  opioid. *Neuron* 7:319-326, 1991
19. Yaksh TL, Harty GJ: Pharmacology of the allodynia in rats evoked by high dose intrathecal morphine. *J Pharmacol Exp Ther* 244:501-507, 1987
20. Yaksh TL, Harty GJ, Onofrio BM: High doses of spinal morphine produce a nonopioid receptor-mediated hyperesthesia: Clinical and theoretic implications. *ANESTHESIOLOGY* 64:590-597, 1986
21. Yaksh TL: Behavioral and autonomic correlates of tactile evoked allodynia produced by spinal glycine inhibition: Effects of modulatory receptor systems and excitatory amino acid antagonists. *Pain* 37:111-123, 1989
22. Yamamoto T, Yaksh TL: Effects of intrathecal strychnine and bicuculline on nerve compression-induced thermal hyperalgesia and selective antagonism by MK-801. *Pain* 54:79-84, 1993

23. Werz MA, MacDonald RL: Opiate alkaloids antagonize post-synaptic glycine and GABA responses: Correlation with convulsant action. *Brain Res* 236:107-119, 1982

24. Glare PA, Walsh TD, Pippenger CE: Normorphine, a neurotoxic metabolite? (letter). *Lancet* 335:725-726, 1990

25. Babul N, Darke AC: Putative role of hydromorphone metabolites in myoclonus (letter). *Pain* 51:260-261, 1992

26. Smith MT, Watt JA, Cramond T: Morphine-3-glucuronide—a potent antagonist of morphine analgesia. *Life Sci* 47:579-585, 1990

27. Potter JM, Reid DB, Shaw RJ, Hackett P, Hickman PE: Myoclonus associated with treatment with high doses of morphine: The role of supplemental drugs. *BMJ* 299:150-153, 1989

28. Sjøgren P, Jonsson T, Jensen N, Drenck N, Jensen TS: Hyperalgesia and myoclonus in terminal cancer patients treated with continuous intravenous morphine. *Pain* 55:93-97, 1993

Anesthesiology

83:863-866, 1995

© 1995 American Society of Anesthesiologists, Inc.  
Lippincott-Raven Publishers

## Severe Neurologic Deficit after Nitrous Oxide Anesthesia

Admir Hadzic, M.D.,\* Krzysztof Glab, M.D.,† Kevin V. Sanborn, M.D.,‡ Daniel M. Thys, M.D.§

THE interaction of nitrous oxide and vitamin B<sub>12</sub> is well known from experimental studies in animals and anecdotal clinical reports.<sup>1-4</sup> Nitrous oxide oxidizes cobalamin in vitamin B<sub>12</sub> and disrupts several pathways involved in one-carbon chemistry. The result is an irreversible inactivation of the enzyme methionine synthase, which requires vitamin B<sub>12</sub> in the +1 oxidation state to act as its coenzyme. The clinical syndrome associated with oxidation of vitamin B<sub>12</sub> devel-

ops after prolonged exposure to nitrous oxide and consists of megaloblastic erythropoiesis and subacute combined degeneration of the spinal cord.<sup>2-4</sup> We present the case of a patient who developed a severe neurologic deficit 6 weeks after anesthesia with nitrous oxide.

### Case Report

A 47-yr-old previously healthy former ballet dancer underwent elective cosmetic surgery of the face and scalp. Her preanesthesia assessment disclosed a history of thyroidectomy at age 16 and a remote history of anemia. The patient did not remember the exact indications for the operation or the type of anesthesia that she received in her home country (Russia) but denied any difficulties perioperatively. She denied smoking or alcoholism and claimed to be an occasional vegetarian. There was no history of intake of vitamins or other medications. Her hematocrit was 41% with a mean corpuscular volume of 99 femtoliters (fl; normal 81-99 fl). The surgical procedure lasted 8 h, during which the patient was anesthetized with fentanyl (200  $\mu$ g) and isoflurane (0.27-0.7%) in a mixture of oxygen and 70% N<sub>2</sub>O. Intraoperative blood loss was less than 100 ml. Her intraoperative and immediate postoperative course was uneventful, and she was discharged home in good condition. Six weeks later, the patient was readmitted to the hospital with complaints of paresthesia in the extremities and unsteady gait. On admission, she gave a history of loss of balance, frequent falling, and worsening numbness and weak-

\* Chief Resident in Anesthesiology.

† CA-2 Resident in Anesthesiology.

‡ Associate Director of Anesthesia; Associate Clinical Professor of Anesthesiology.

§ Director of Anesthesia; Professor of Clinical Anesthesiology.

Received from the Department of Anesthesiology, St. Luke's-Roosevelt Hospital Center, Columbia University College of Physicians and Surgeons, New York, New York. Submitted for publication January 27, 1995. Accepted for publication May 10, 1995.

Department of Anesthesiology, St. Luke's-Roosevelt Hospital Center, Amsterdam Avenue at 114th Street, New York, New York 10025.

Key words: Anesthesia; adverse effects. Anesthetics, gases: nitrous oxide. Anemia: pernicious anemia. Complications: neurologic; paralysis. Spinal cord: paraplegia. Vitamins: B<sub>12</sub>.
